# Supplementary material for: Synthesis and characterization of a core–shell BiVO4@g-C3N4 photo-catalyst with enhanced photocatalytic activity under visible light irradiation
Source: Royal Society of Chemistry journal article supplement (doi:10.1039/c6ra27766g), 2017-01-01
Supplement: c6ra27766g1.pdf [file c6ra27766g1.pdf]

Electronic Supplementary Information

**Synthesis and characterization of core-shell BiVO<sub>4</sub>@g-C<sub>3</sub>N<sub>4</sub> photo-catalyst with enhanced photocatalytic activity under visible light irradiation**

Zisheng Zhang<sup>1,3</sup>, Miao Wang<sup>1</sup>, Wenquan Cui<sup>\*2</sup>, Hong Sui<sup>\*1,4</sup>

*1 School of Chemical engineering and Technology, Tianjin University, Tianjin, PR China, 300072*

*2 College of Chemical Engineering, Hebei Key Laboratory for Environment Photocatalytic and Electrocatalytic Materials, North China University of Science and Technology, Tangshan, PR China, 063009*

*3 Department of chemical and Biological Engineering, University of Ottawa, Ottawa, Canada*

*4 National Engineering Research Centre for Distillation Technology, Tianjin, PR China, 300072*

**ESI-1**

Fig. S1 shows the whole spectral scanning of RhB during the photo-degradation process of g-C<sub>3</sub>N<sub>4</sub>, BiVO<sub>4</sub>, blank, dark and BiVO<sub>4</sub>@ g-C<sub>3</sub>N<sub>4</sub> (1,3,5,10wt.%) :

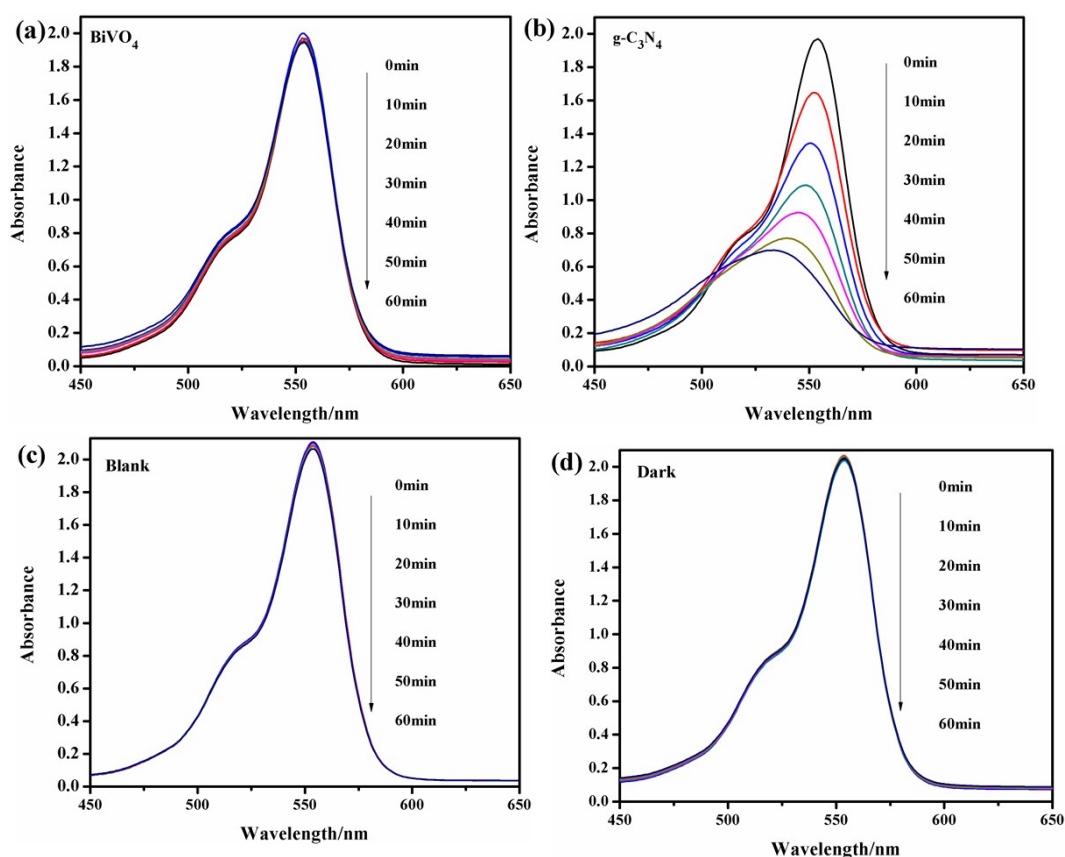

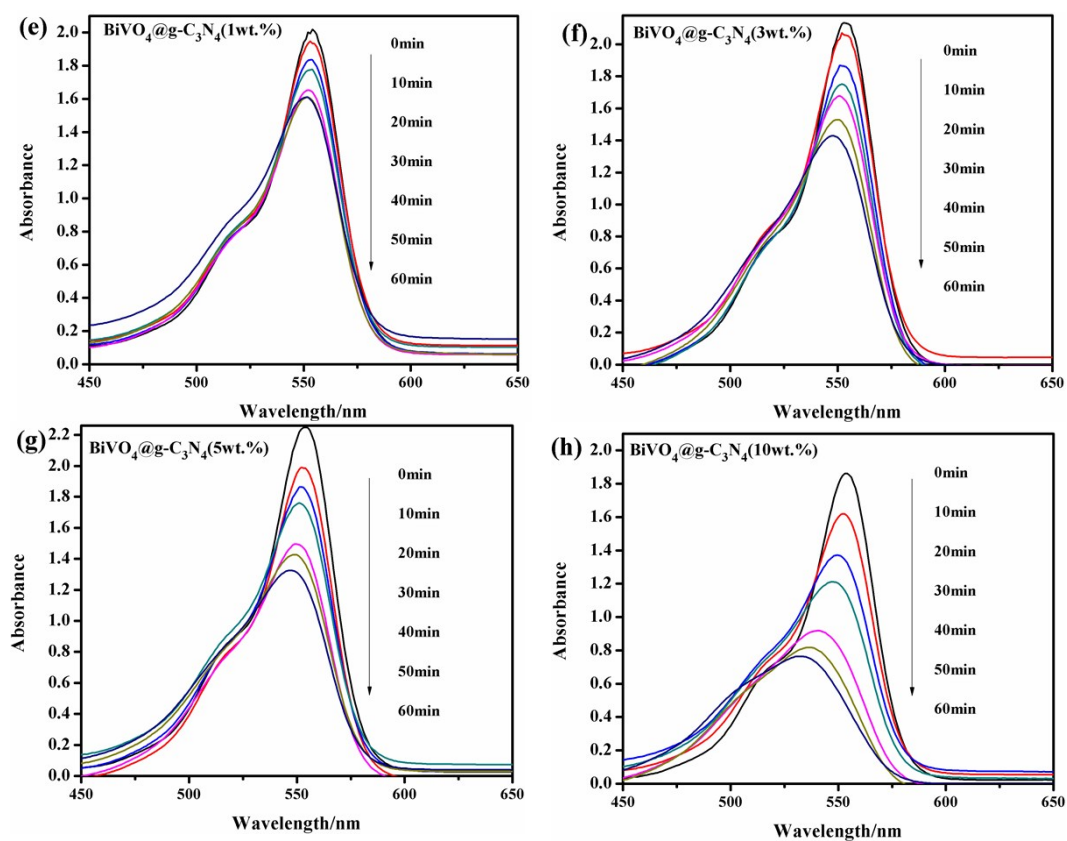

Fig. S1 the whole spectral scanning of RhB during the photo-degradation for (a)  $\text{BiVO}_4$ ; (b)  $\text{g-C}_3\text{N}_4$ ; (c) blank; (d) dark; (e)  $\text{BiVO}_4@ \text{g-C}_3\text{N}_4$  (1wt.%) ; (f)  $\text{BiVO}_4@ \text{g-C}_3\text{N}_4$  (3wt.%) ; (g)  $\text{BiVO}_4@ \text{g-C}_3\text{N}_4$  (5wt.%) ; (h)  $\text{BiVO}_4@ \text{g-C}_3\text{N}_4$  (10wt.%)
